# Supplementary material for: Performance of a nanowire-like aluminium-based organometallic complex with high activity for the electrocatalysis of CO2 to CO
Source: Royal Society of Chemistry journal article supplement (doi:10.1039/d3nj05073d), 2024-01-01
Supplement: d3nj05073d1.pdf [file d3nj05073d1.pdf]

## Supporting Information

### Performance of nanowire-like aluminium-based organometallic complex with high activity electrocatalysis of CO<sub>2</sub> to CO

Boming Lu<sup>1</sup>, Tianxia Liu<sup>1,2\*</sup>, Xuejiao Ma<sup>1</sup>, Yaping Zhang<sup>3</sup>

1. School of Chemistry and Chemical Engineering, North Minzu University, Yinchuan 750021, P.R.China
2. Key Laboratory for Chemical Engineering and Technology, State Ethnic Affairs Commission, North Minzu University, Yinchuan 750021, P.R.China
3. School of Materials Science and Chemistry, Southwest University of Science and Technology, Mianyang, 621010, P.R.China

\*Corresponding author.

E-mail address: [2005053@nmu.edu.cn](mailto:2005053@nmu.edu.cn) (Tianxia Liu)

The gas chromatograph (GC) uses a three-valve, three-column system to achieve simultaneous analysis of multiple components in one injection, using a column (capillary column) to separate the sample, and the separated components enter the detector in turn, a hydrogen flame ionization detector (FID), a thermal conductivity detector (TCD), with the specific conditions shown in Table S1. Qualitative analysis is to determine which substances the components are by retention time, and quantitative analysis is to determine the content of each component by peak area. The standard gases are a mixture of methane (CH<sub>4</sub>), ethylene (C<sub>2</sub>H<sub>4</sub>), ethane (C<sub>2</sub>H<sub>6</sub>), carbon monoxide (CO), hydrogen (H<sub>2</sub>) and oxygen (O<sub>2</sub>) at different concentrations, and the FID detector determines the content of methane, ethylene, ethane and carbon monoxide, and the TCD detector determines the content of hydrogen and oxygen. The standard spectra are shown in Fig. S1, and the parameters are shown in Table S2. All the gas control of the inlet and detector are controlled by using electric pneumatic control (EPC), and the gas pressure control accuracy reaches 0.001 psi, so the automation degree of the equipment and the repeatability and accuracy of the experiment are guaranteed.

The products of 2-MI/Al-F-N catalysts in this work in the electrocatalytic reduction of CO<sub>2</sub> were determined by gas chromatography. The Faraday efficiency (FE) of these three materials was obtained by averaging the test results of three times at each potential. Calculation formula is shown below, and only one spectrogram at -1.1 V vs. RHE potential is given (Fig. S2 and Table S3,).

Faraday efficiency (FE) calculation formula, using CO as an example:

$$FE_{CO} = \frac{n_{CO} \times Z \times F}{Q} = \frac{n_{CO} \times 2 \times 96485}{t \times I}$$

$n_{CO}$ : The amount of carbon monoxide substance;

Z: Number of transferred electrons (H<sub>2</sub> is 2e, CO is 2e, CH<sub>4</sub> is 8e, C<sub>2</sub>H<sub>4</sub> is 12e, so Z = 2);

F: Faraday's constant ( $F = 96485 \text{ C mol}^{-1}$ );

Q: The total amount of charge ( $Q = I \times t$ );

I: The current on the electrochemical workstation, generally in mA, needs to be

converted into A in calculation.

t: General take 1s directly ( $t = 1s$ ).

$$n_{CO} = \frac{P \times V_{CO}}{R \times T} = \frac{101325 Pa \times V_{CO}}{8.314 J mol^{-1} K^{-1} \times 298.15 K}$$

$$V_{CO} = V \times C_{CO} = V_{MFC} \times t$$

P: Pressure ( $P = 101325 Pa$ );

R: Gas constant ( $R = 8.314 J mol^{-1} K^{-1}$ )

T: Temperature ( $T = 298.15 K$ )

$V_{CO}$ : Carbon monoxide volume;

$C_{CO}$ : Carbon monoxide concentration measured by GC (ppm);

$V_{MFC}$ : The mass controller controls the gas flow rate and the unit must be converted to  $m^3 s^{-1}$ , but the unit usually obtained is  $mL min^{-1}$ . (For example, the  $CO_2$  flow rate in this paper is  $20 mL min^{-1}$ , so  $V_{MFC} = \frac{1}{3} \times 10^{-6} m^3 s^{-1}$ ).

**Table S1** The type of GC column and conditions

| Detector                             | FID                           | TCD     |
|--------------------------------------|-------------------------------|---------|
| Chromatographic column               | HP-PLOT-Q 30m × 0.32mm × 20μm |         |
| Column temperature (°C)              | 80.0                          | 80.0    |
| Detector temperature (°C)            | 250.0                         | 160.0   |
| Sample inlet temperature (°C)        | 250.0                         |         |
| Column flow (mL/min) (constant flow) | 3.0                           | 3.0     |
| Air flow (mL/min)                    | 400.0                         | 400.0   |
| Hydrogen flow (mL/min)               | 60.0                          | 60.0    |
| Make-up gas (mL/min)                 | 10.0                          | 2.0     |
| Split Ratio                          | 10.0: 1                       | 10.0: 1 |
| Carrier gas                          | Ar                            |         |

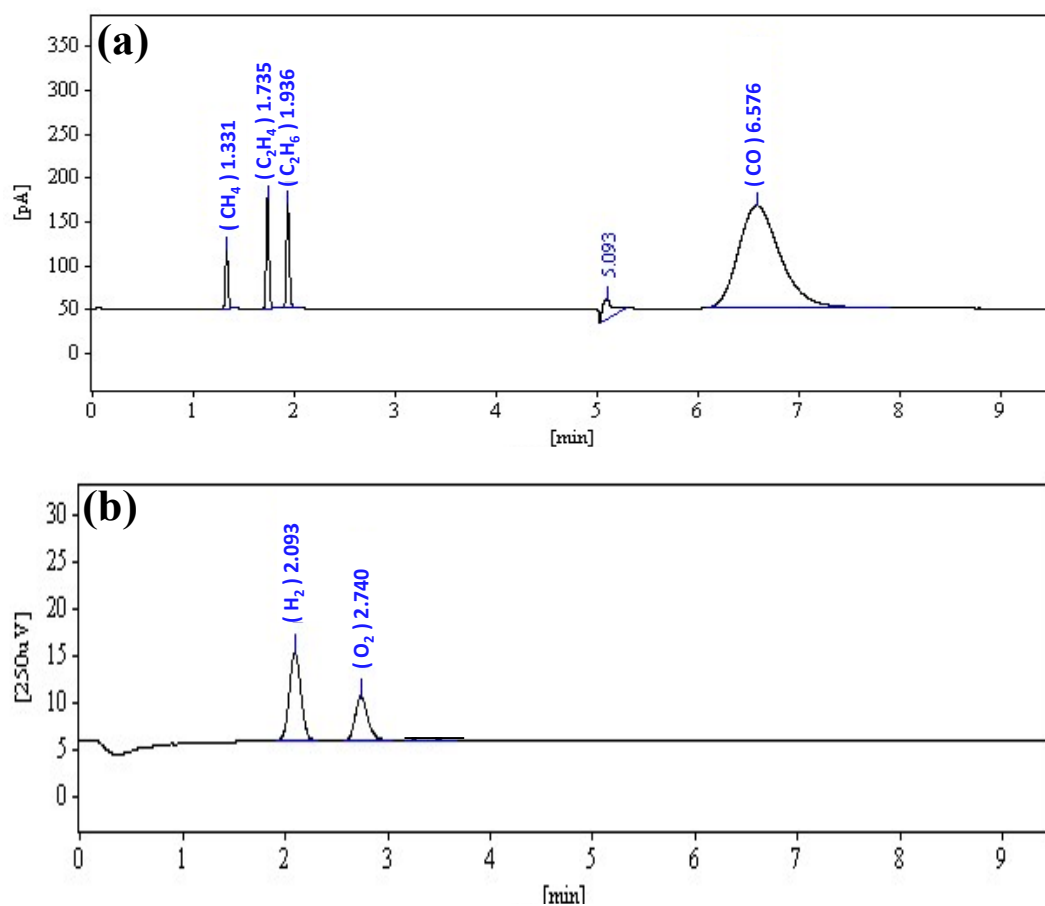

**Fig. S1** Gas chromatogram for (a) FID detector and (b) TCD detector of standard gas.

**Table S2** The data of each substance in the gas chromatogram of standard gas

| Gas composition          | CH <sub>4</sub> | C <sub>2</sub> H <sub>4</sub> | C <sub>2</sub> H <sub>6</sub> | CO      | H <sub>2</sub> | O <sub>2</sub> |
|--------------------------|-----------------|-------------------------------|-------------------------------|---------|----------------|----------------|
| Retention time (min)     | 1.331           | 1.735                         | 1.936                         | 6.576   | 2.093          | 2.740          |
| Peak height (Pa/250uV)   | 67.33           | 125.51                        | 118.91                        | 116.85  | 9.45           | 4.74           |
| Peak area (Pa*s/250uV*s) | 125.54          | 245.94                        | 243.71                        | 3365.82 | 74.82          | 41.29          |
| Concentration (ppm)      | 205             | 196                           | 199                           | 194     | 201            | 500            |

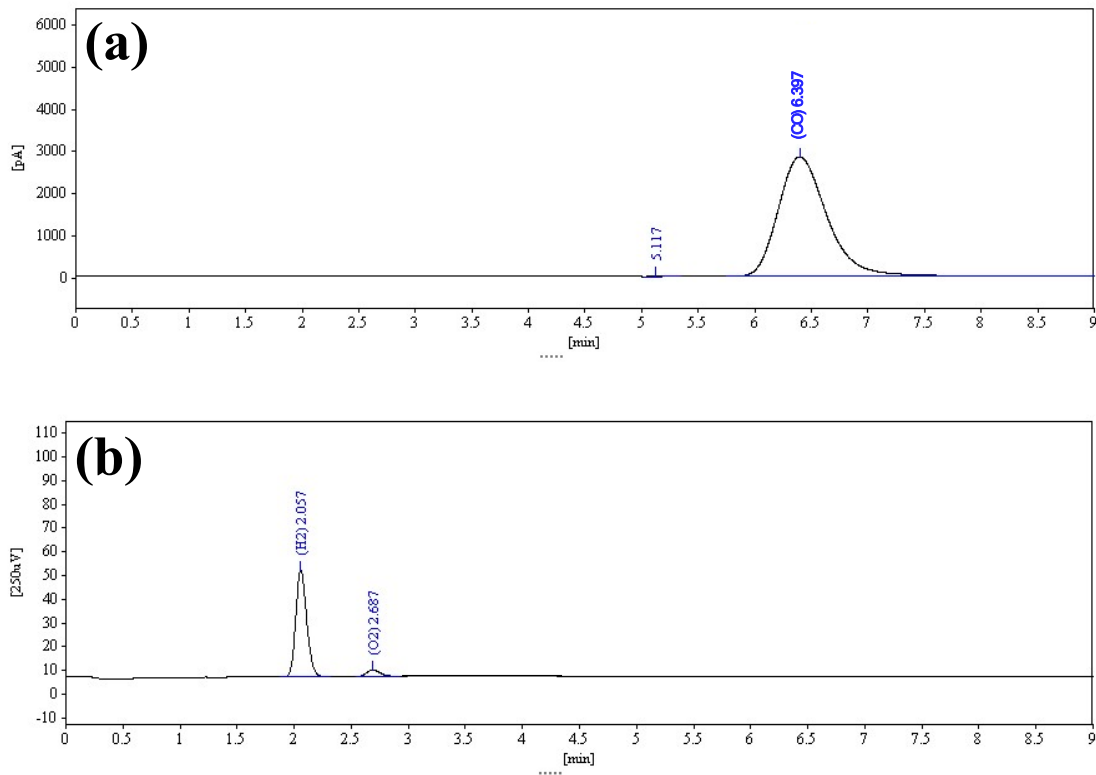

**Fig. S2** Gas chromatogram for (a) FID detector and (b) TCD detector of 2-MI/Al-F-N.

**Table S3** The data of each substance in the gas chromatogram of 2-MI/Al-F-N

| Gas composition          | CO       | H <sub>2</sub> |
|--------------------------|----------|----------------|
| Retention time (min)     | 6.397    | 2.057          |
| Peak height (Pa/250uV)   | 2829.00  | 44.95          |
| Peak area (Pa*s/250uV*s) | 85344.09 | 300.01         |
| Concentration (ppm)      | 4072     | 545            |

**Table S4** Summary of CO<sub>2</sub>RR to CO performance on different electrocatalysts

| Catalyst                            | j (mA cm <sup>-2</sup> ) | V vs. RHE | Electrolyte (pH)               | Main products                      | Ref.      |
|-------------------------------------|--------------------------|-----------|--------------------------------|------------------------------------|-----------|
| 2-MI/Al-F-N                         | 9.51                     | -1.1      | 0.1 M KHCO <sub>3</sub> (6.8)  | CO (90.1%), H <sub>2</sub> (9.9%)  | This work |
| Cu-Al/LDHs                          | 50                       |           | 1 M KHCO <sub>3</sub> (8.4)    | CO (42%), formate (22%)            | [2]       |
| FePc-graphene                       | 1.7                      | -0.6      | 0.1 M KHCO <sub>3</sub> (6.8)  | CO (89.7%), H <sub>2</sub> (10.3%) | [3]       |
| Sn <sub>4</sub> P <sub>3</sub> /RGO | 68.0                     | -1.8      | 0.5 M [Bmim]PF <sub>6</sub>    | CO (96.6%), H <sub>2</sub> (3.4%)  | [4]       |
| Ni(OH) <sub>2</sub> @RGO            | 2.3                      | -0.9      | 0.1 M KHCO <sub>3</sub> (6.8)  | CO (88.2%), H <sub>2</sub> (11.8%) | [5]       |
| Ni-AlO(OH) <sub>3</sub> @RGO        | 5.1                      | -0.9      | 0.1 M KHCO <sub>3</sub> (6.8)  | CO (92.2%), H <sub>2</sub> (7.8%)  | [5]       |
| N-NiZnAl CLDH/RGO                   | 9.4                      | -0.83     | 0.5 M NaCl (7.0)               | CO (92%), H <sub>2</sub> (8%)      | [6]       |
| N-doped carbon@Ni on rGO            | 23                       | -0.97     | 0.5 M KHCO <sub>3</sub> (7.2)  | CO (90%), H <sub>2</sub> (10%)     | [7]       |
| Ni/NCTs                             | 34.3                     | -1.0      | 0.5M KHCO <sub>3</sub> (7.2)   | CO (98%), H <sub>2</sub> (2%)      | [8]       |
| N-Ta <sub>2</sub> O <sub>5</sub> /C | 5                        | -0.73     | 0.5M NaHCO <sub>3</sub> (8.32) | CO (87.5%), H <sub>2</sub> (12.5%) | [9]       |
| CN-H-CNT                            |                          | -0.5      | 0.1 M KHCO <sub>3</sub> (6.8)  | CO (88%), H <sub>2</sub> (12%)     | [10]      |

## References:

- [1] S. Jin, Z. Hao, K. Zhang, Z. Yan, J. Chen, Advances and Challenges for the Electrochemical Reduction of CO<sub>2</sub> to CO: From Fundamentals to Industrialization, *Angew Chem Int Ed Engl* 60(38) (2021) 20627-20648.
- [2] K. Iwase, T. Hirano, I. Honma, Copper Aluminum Layered Double Hydroxides with Different Compositions and Morphologies as Electrocatalysts for the Carbon Dioxide Reduction Reaction, *ChemSusChem* 15(2) (2022) e202102340.
- [3] X. Li, G. Chai, X. Xu, J. Liu, Z. Zhong, A. Cao, Z. Tao, W. You, L. Kang, Electrocatalytic reduction of CO<sub>2</sub> to CO over iron phthalocyanine-modified graphene nanocomposites, *Carbon* 167 (2020) 658-667.
- [4] L. Lu, W. Guo, C. Chen, Q. Zhu, J. Ma, H. Wu, D. Yang, G. Yang, X. Sun, B. Han, Synthesis of Sn<sub>4</sub>P<sub>3</sub>/reduced graphene oxide nanocomposites as highly efficient electrocatalysts for CO<sub>2</sub> reduction, *Green Chemistry* 22(20) (2020) 6804-6808.
- [5] E.R. Liu, T.X. Liu, X.J. Ma, Y.P. Zhang, The electrocatalytic performance of Ni-AlO(OH)(3)@RGO for the reduction of CO<sub>2</sub> to CO, *New J. Chem.* 46(25) (2022) 12023-12033.
- [6] W.T. Li, P.F. Hou, Z. Wang, P. Kang, Synergistic effect of N-doped layered double hydroxide derived NiZnAl oxides in CO<sub>2</sub> electroreduction, *Sustainable Energy & Fuels* 3(6) (2019) 1455-1460.
- [7] Y. Zhao, Z. Miao, F. Wang, M. Liang, Y. Liu, M. Wu, L. Diao, J. Mu, Y. Cheng, J. Zhou, N-doped carbon-encapsulated nickel on reduced graphene oxide materials for efficient CO<sub>2</sub> electroreduction to syngas with potential-independent H<sub>2</sub>/CO ratios, *Journal of Environmental Chemical Engineering* 9(4) (2021).
- [8] Y. Hou, Y.-L. Liang, P.-C. Shi, Y.-B. Huang, R. Cao, Atomically dispersed Ni species on N-doped carbon nanotubes for electroreduction of CO<sub>2</sub> with nearly 100% CO selectivity, *Applied Catalysis B: Environmental* 271 (2020).
- [9] M. Zhang, P. Hou, Z. Wang, P. Kang, Nitrogen-Doped Ta<sub>2</sub>O<sub>5</sub> Nanocomposites for the Electrocatalytic Reduction of Carbon Dioxide to CO with Photoassistance, *ChemElectroChem* 5(5) (2018) 799-804.
- [10] X. Cui, Z. Pan, L. Zhang, H. Peng, G. Zheng, Selective Etching of Nitrogen-Doped Carbon by

Steam for Enhanced Electrochemical CO<sub>2</sub> Reduction, *Advanced Energy Materials* 7(22) (2017).
